# Supplementary material for: The Deep Proteomics Approach Identified Extracellular Vesicular Proteins Correlated to Extracellular Matrix in Type One and Two Endometrial Cancer
Source: MDPI journal article supplement (doi:10.3390/ijms25094650), 2024-04-24
Supplement: s1 [file s1]

**Supplement Table S7.** Clinico-pathological characteristics of the 13 controls women enrolled in the study

| Sample type | Age | Diagnosis           | ICD-11 |
|-------------|-----|---------------------|--------|
| Control     | 47  | Leiomyoma of uterus | 2E86.0 |
| Control     | 42  | Leiomyoma of uterus | 2E86.0 |
| Control     | 45  | Leiomyoma of uterus | 2E86.0 |
| Control     | 40  | Leiomyoma of uterus | 2E86.0 |
| Control     | 32  | Leiomyoma of uterus | 2E86.0 |
| Control     | 44  | Leiomyoma of uterus | 2E86.0 |
| Control     | 47  | Leiomyoma of uterus | 2E86.0 |
| Control     | 42  | Leiomyoma of uterus | 2E86.0 |
| Control     | 47  | Leiomyoma of uterus | 2E86.0 |
| Control     | 41  | Leiomyoma of uterus | 2E86.0 |
| Control     | 51  | Leiomyoma of uterus | 2E86.0 |
| Control     | 42  | Leiomyoma of uterus | 2E86.0 |
| Control     | 45  | Leiomyoma of uterus | 2E86.0 |
