# Supplementary material for: The Deep Proteomics Approach Identified Extracellular Vesicular Proteins Correlated to Extracellular Matrix in Type One and Two Endometrial Cancer
Source: MDPI journal article supplement (doi:10.3390/ijms25094650), 2024-04-24
Supplement: s1 [file s1]

**Supplementary Table S6:** Clinico-pathological characteristics of the 13 EC women enrolled in the study.

| Sample number | Age | Histotype (Grade)                                            | Tumor dimensions (cm)         | TNM Classification of Malignant Tumours, 7 <sup>th</sup> Edition | Stage | ICD-11 |
|---------------|-----|--------------------------------------------------------------|-------------------------------|------------------------------------------------------------------|-------|--------|
| 80            | 70  | Endometroid adenocarcinoma (G2)                              | 2x1,7                         | pT1b N0 G2 LVI+                                                  | I B   | 2C76   |
| 177           | 79  | Endometroid adenocarcinoma (G1)                              | 4.8x3.8                       | pT1b G1 LVI+ R0                                                  | IB    | 2C76   |
| 45            | 75  | Endometroid adenocarcinoma (G2)                              | 3                             | pT1b G2 Nx                                                       | I B   | 2C76   |
| 190           | 56  | Endometroid adenocarcinoma (G1)                              | 3 x 2.5 x 0.5                 | pT1a N0(sn)(i-) G1 LVI- R0                                       | IA    | 2C76   |
| 168           | 72  | Endometroid adenocarcinoma (G3)                              | Macroscopically not evaluable | pT1a N0 G3 LVI - R0                                              | IA    | 2C76   |
| 130           | 52  | Endometroid adenocarcinoma (G1)                              | 4.6                           | pT1a G1 LV- R0                                                   | IA    | 2C76   |
| 124           | 72  | Endometroid adenocarcinoma (G2)                              | 2.5                           | pT1b N0 G2 LVI- R0                                               | I B   | 2C76   |
| 185           | 60  | Serous carcinoma (G3)                                        | 2x0.7                         | pT1a N0 G3 V0 Pn0 R0                                             | IA    | 2C76   |
| 238           | 83  | Endometroid adenocarcinoma (G3)                              | 2.7x2x2.4                     | pT1b N1 M1 LVI +                                                 | IV A  | 2C76   |
| 179           | 81  | Endometroid adenocarcinoma (G2)                              | 5.2x4.2x1.3                   | pT2 Nx V1 Pn0 R0                                                 | II    | 2C76   |
| 119           | 87  | Endometroid adenocarcinoma + papillary serous carcinoma (G3) | 3x3                           | pT3a G3 LVI+ R1.                                                 | II    | 2C76   |
| 63            | 73  | Papillary serous carcinoma (G3)                              | 4x3x3                         | pT1b N0 G3 LVI+                                                  | I B   | 2C76   |
| 169           | 56  | Endometroid adenocarcinoma (G3)                              | 5                             | pT3b N1 G3 LV1 R1                                                | IIIC1 | 2C76   |
