# Supplementary material for: The Deep Proteomics Approach Identified Extracellular Vesicular Proteins Correlated to Extracellular Matrix in Type One and Two Endometrial Cancer
Source: MDPI journal article supplement (doi:10.3390/ijms25094650), 2024-04-24

## Whole membrane stained with red ponceau

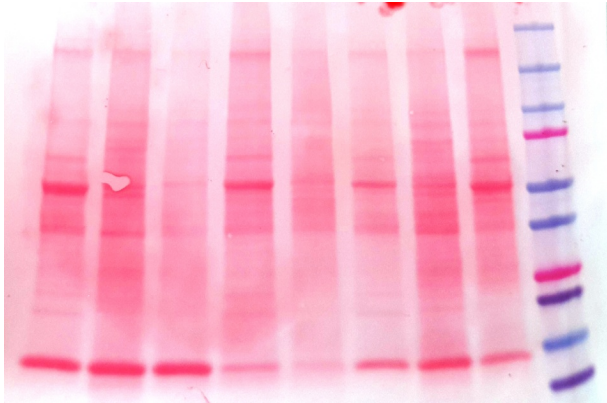

Tissue lysate membrane 1

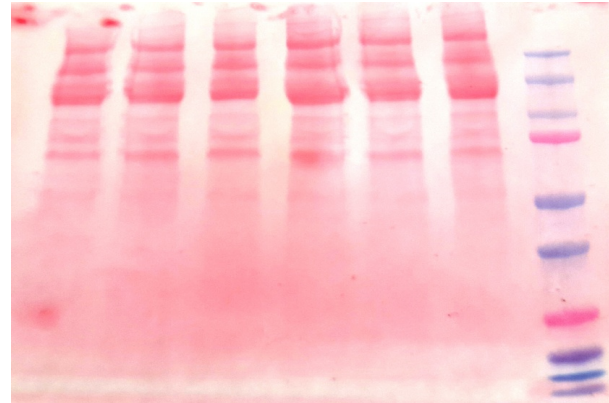

Cell lysate membrane

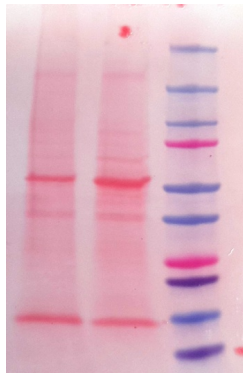

Tissue lysate membrane 4

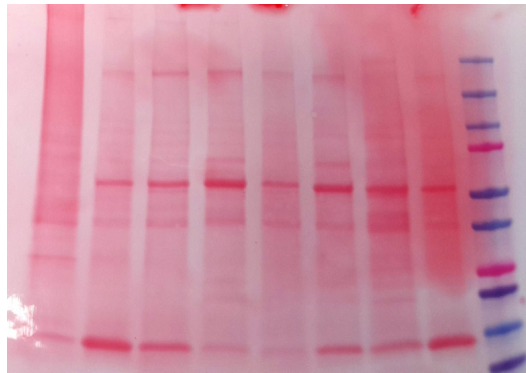

Tissue lysate membrane 3

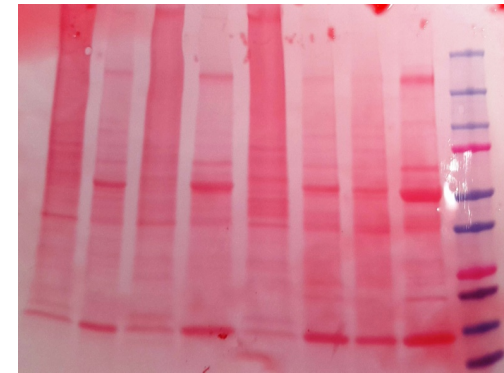

Tissue lysate membrane 2

# Lysate cells

AN3CA

ISHIKAWA

3

2

1

3

2

1

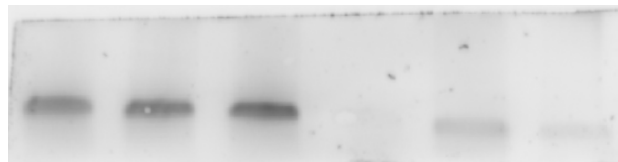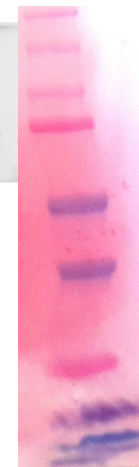

250 kDa

150 kDa

100 kDa

75 kDa

50 kDa

37 kDa

25 kDa

20 kDa

15 kDa

10 kDa

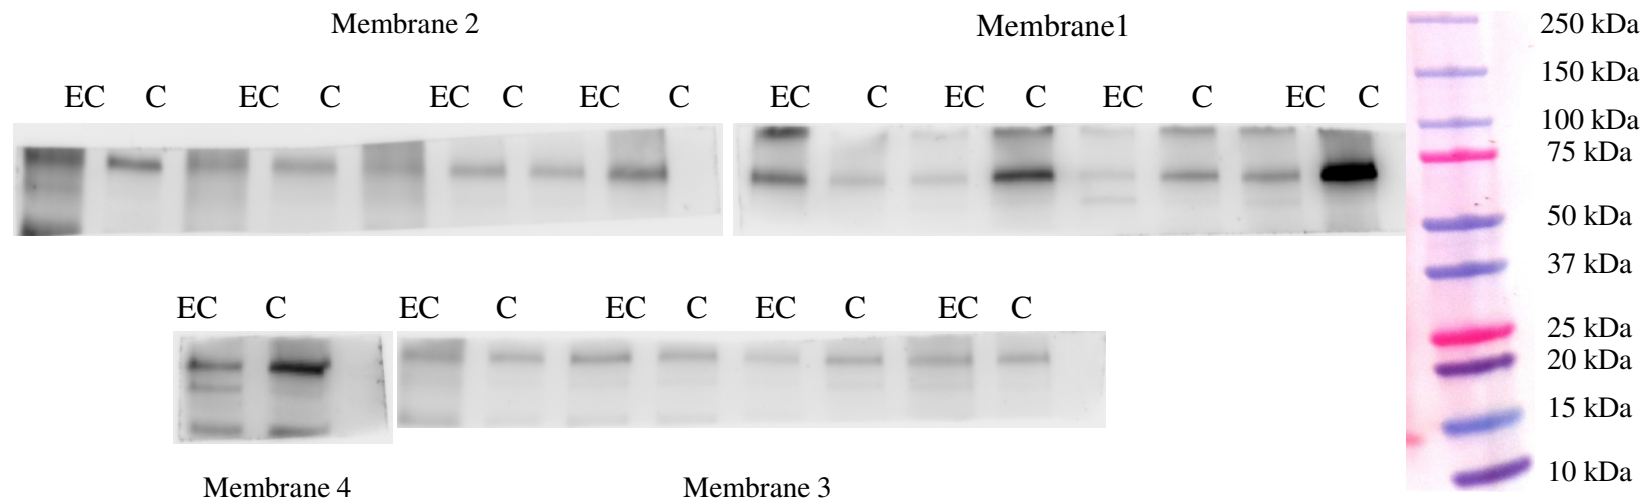

Whole membrane of MMP2 protein

C-control  
EC- endometrial cancer

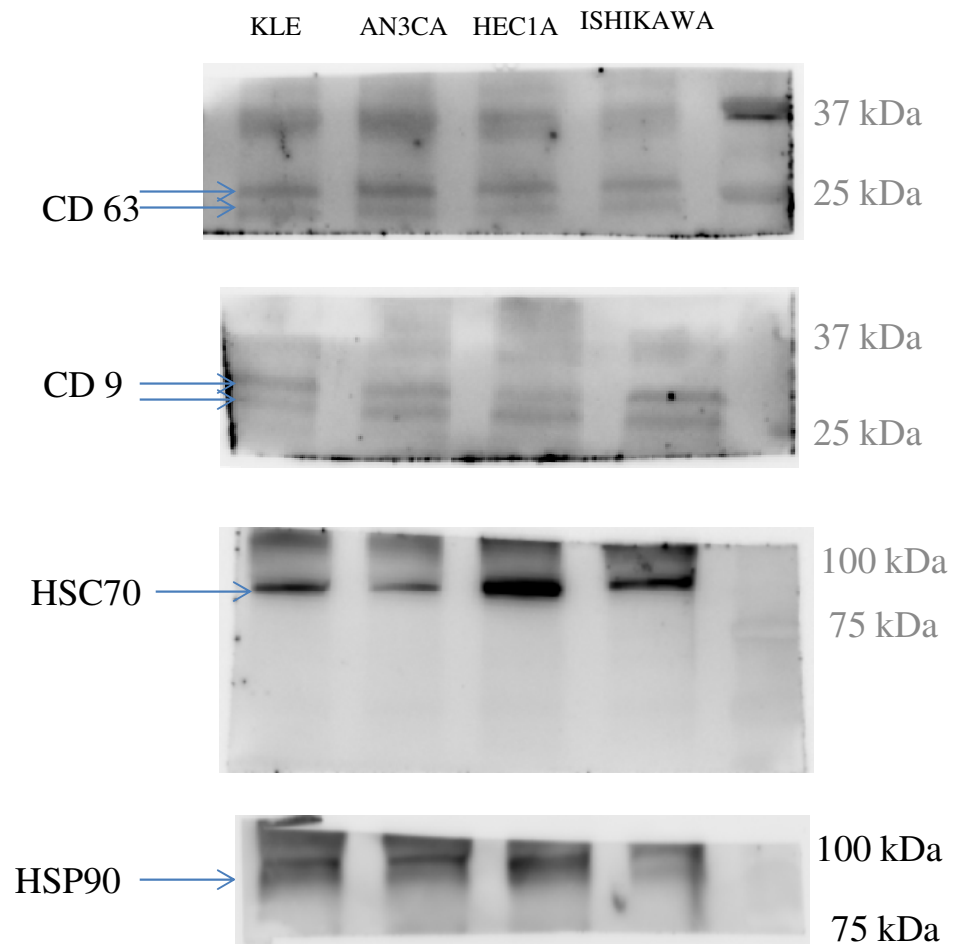

Supplement: s1 [file s1]
